# Supplementary material for: Tacrolimus reverses pemphigus vulgaris serum-induced depletion of desmoglein in HaCaT cells via inhibition of heat shock protein 27 phosphorylation
Source: PubMed Central journal article supplement (PMC10634089; doi:10.1186/s12865-023-00582-z), 2023-11-08

# Figure 1

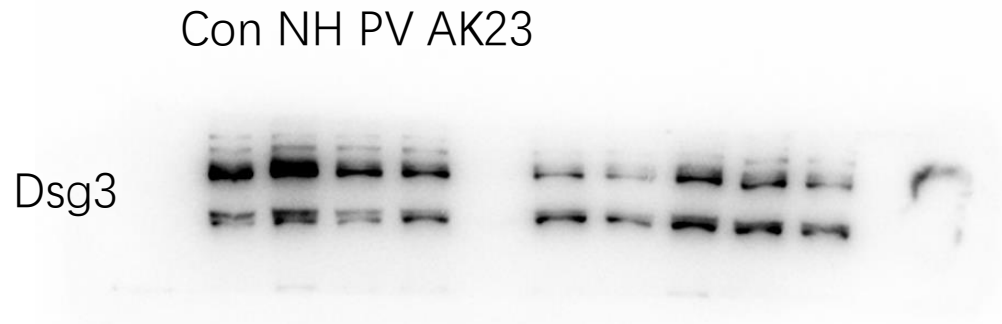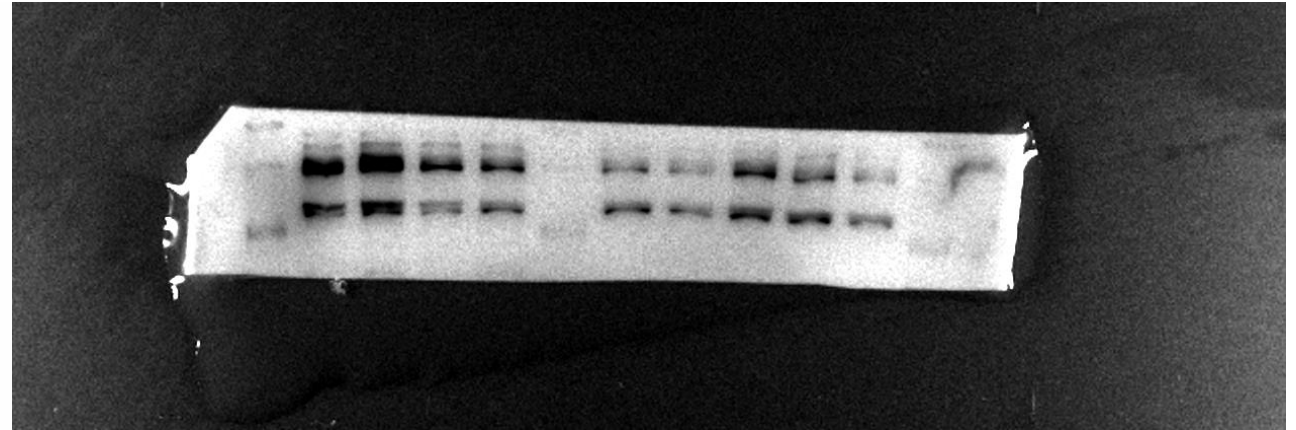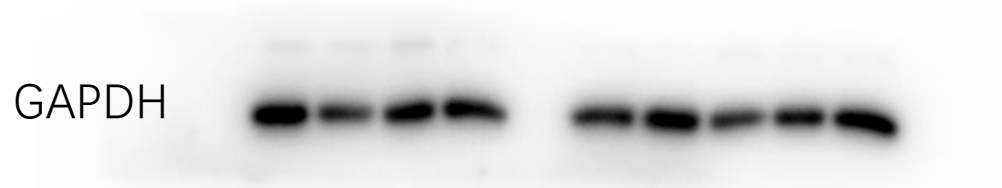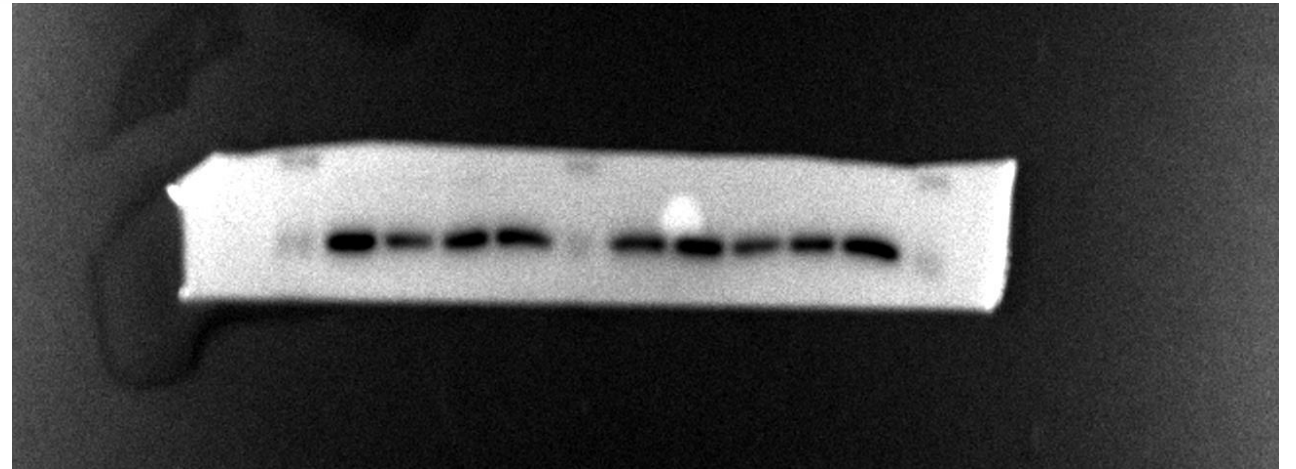

# Figure 2A

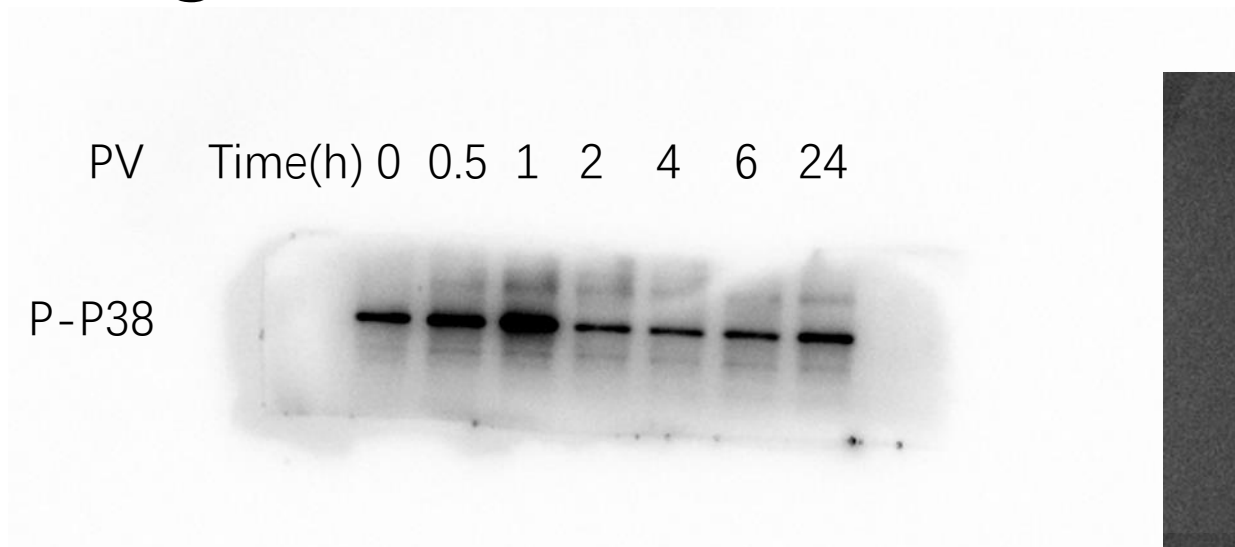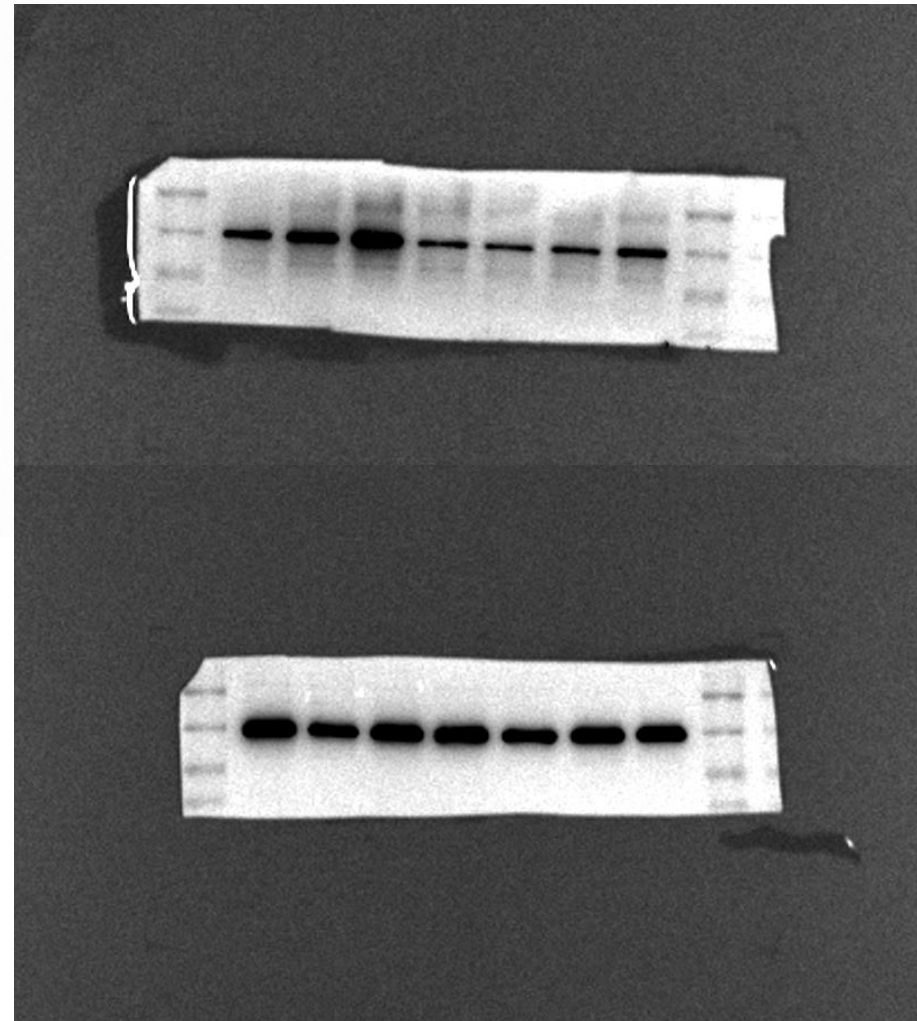

# Figure 2A

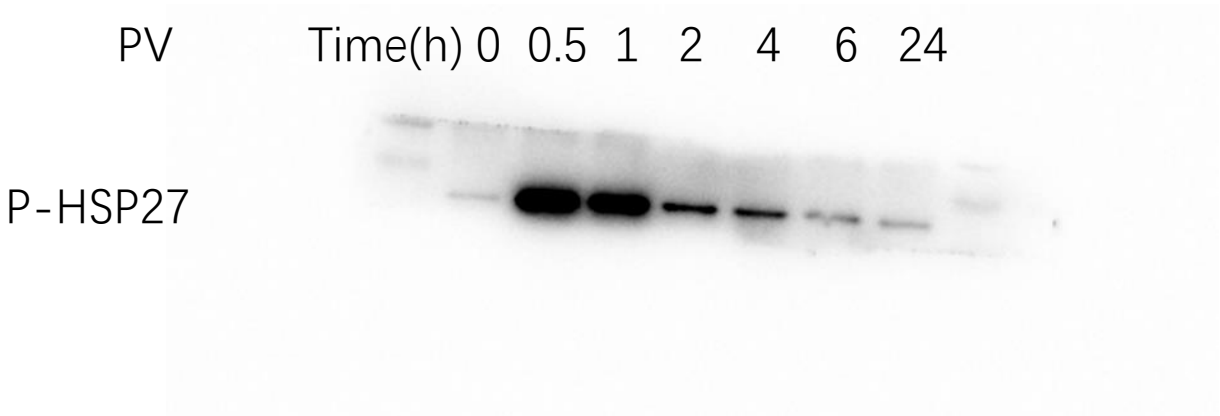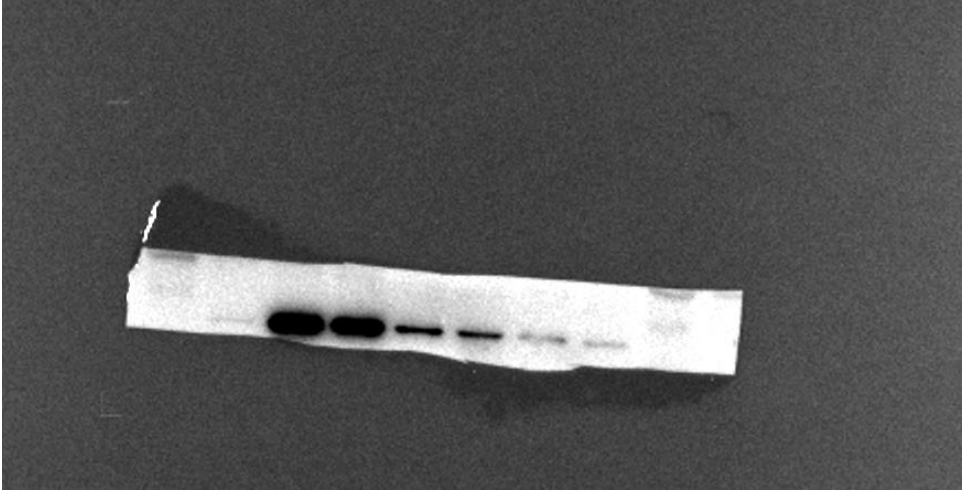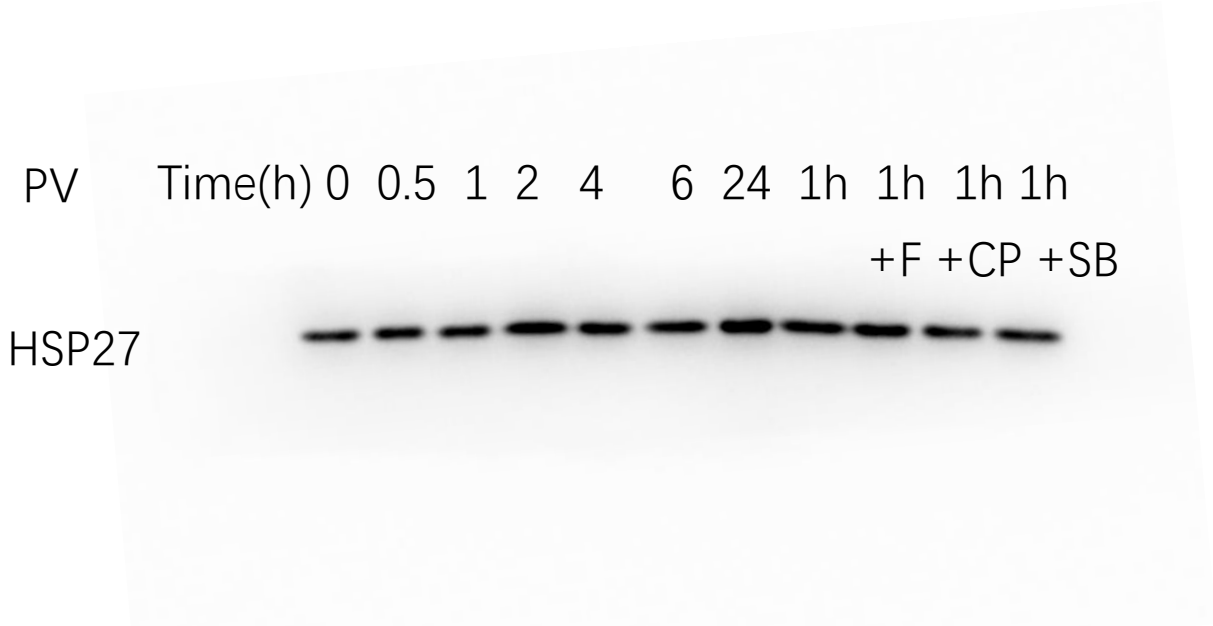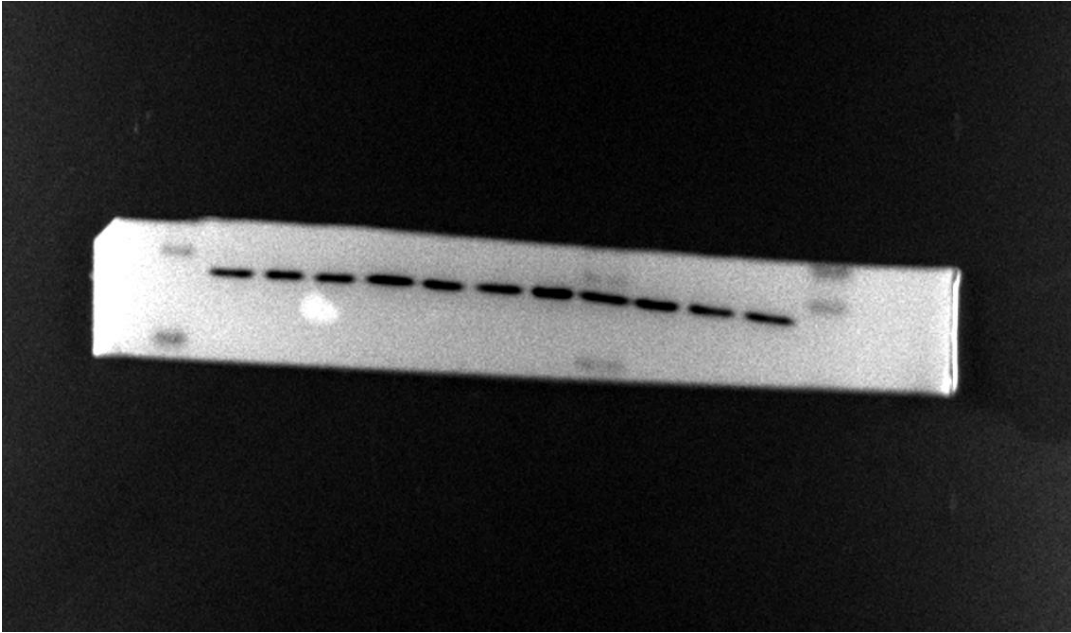

# Figure 2A

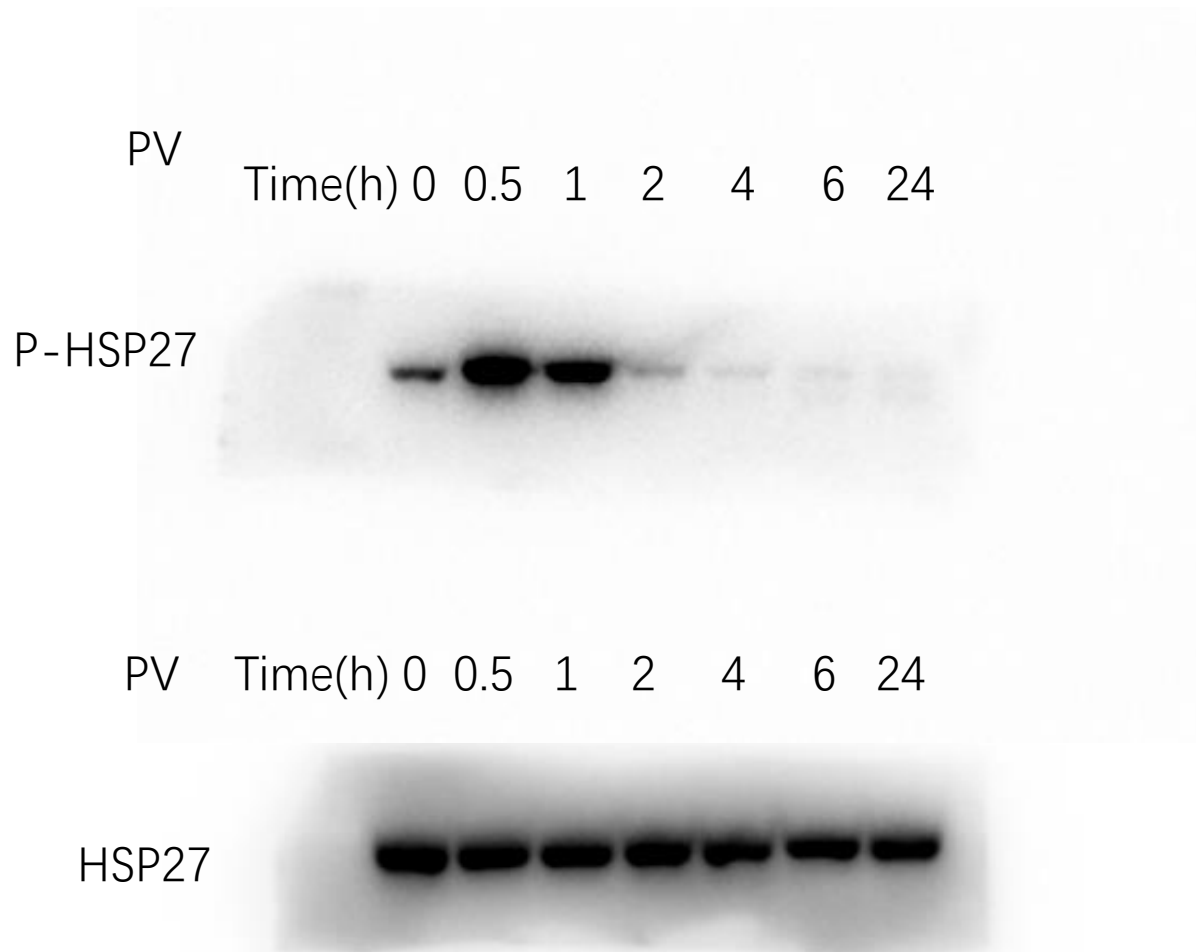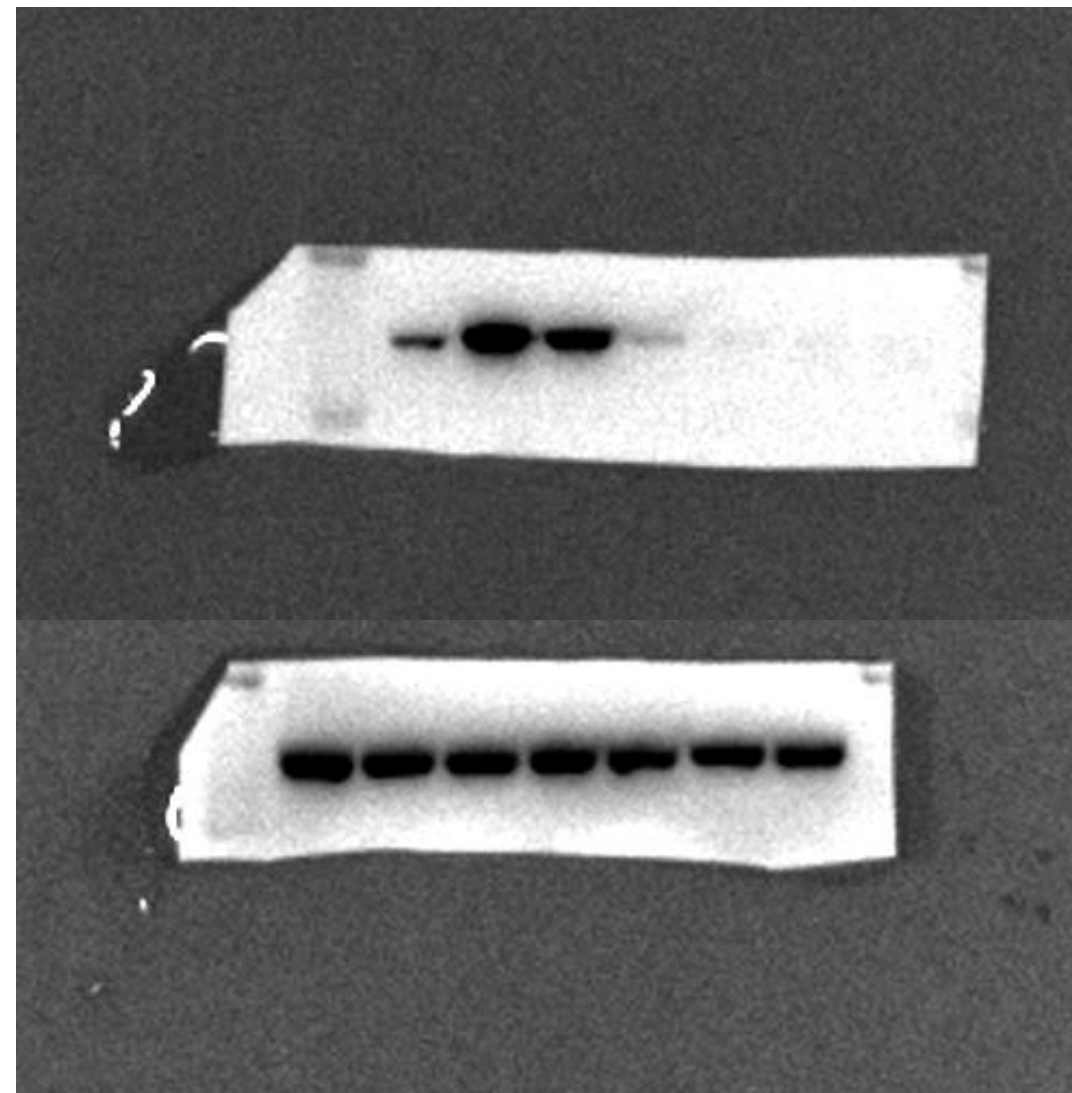

# Figure2B

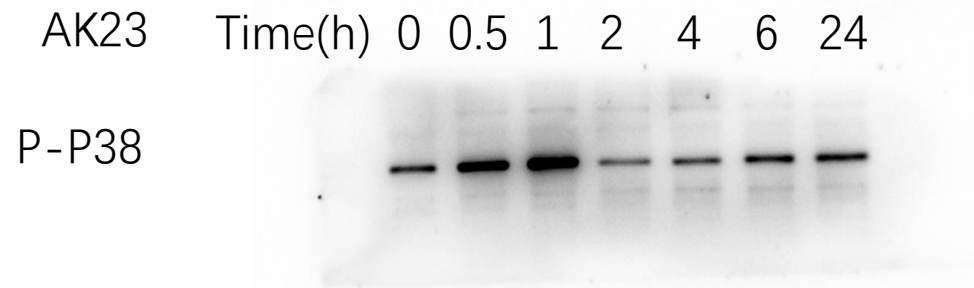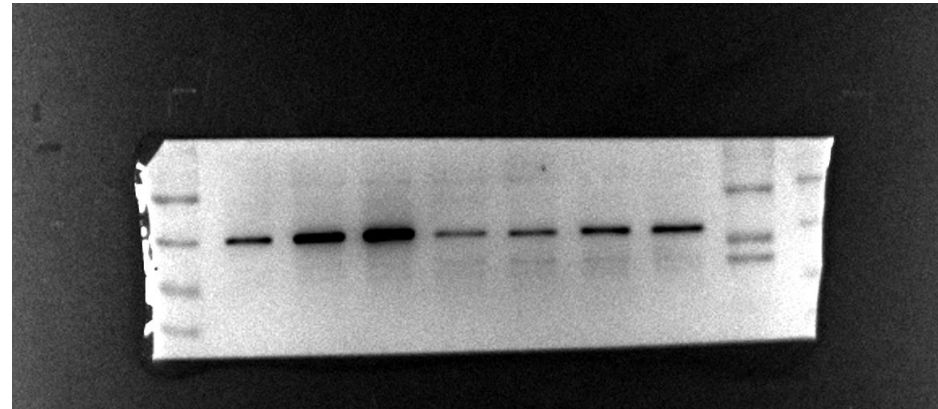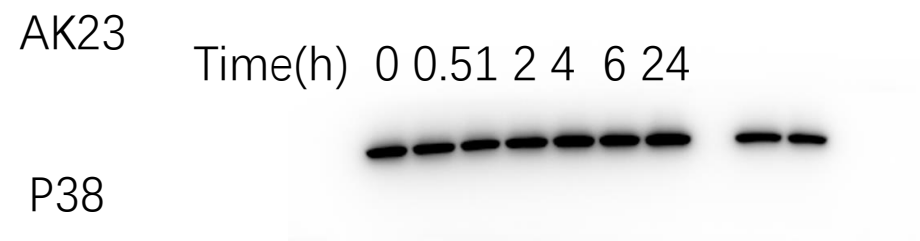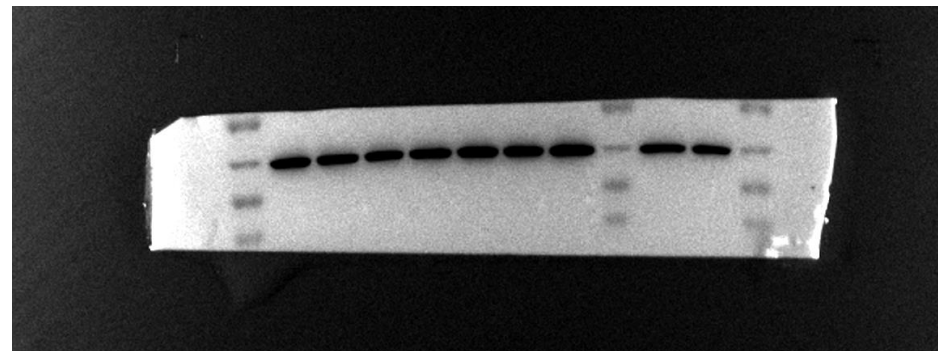

# Figure2B

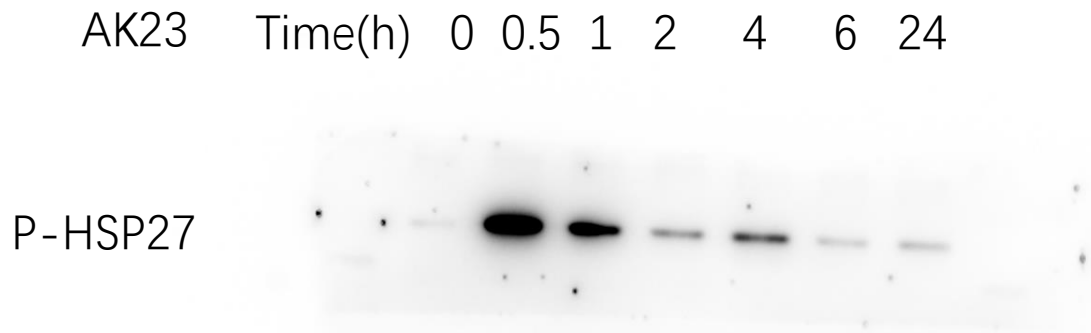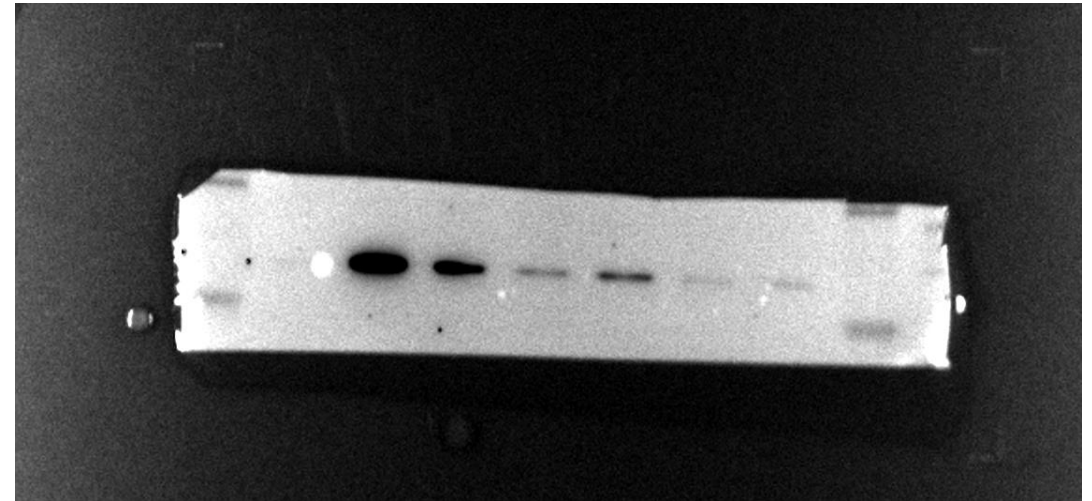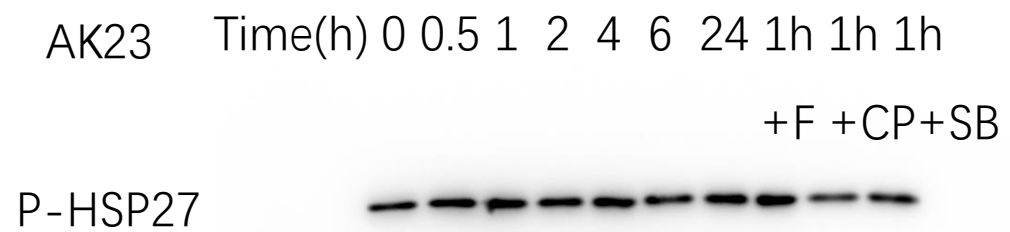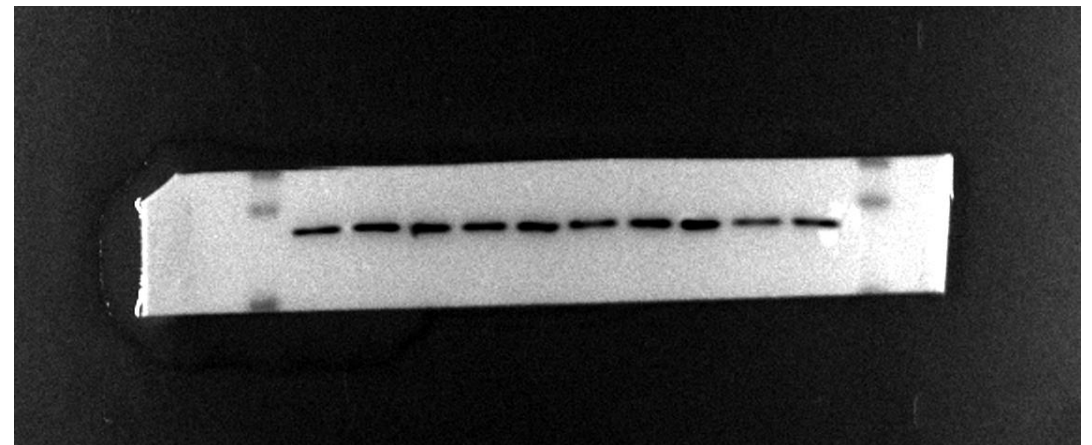

# Figure 3

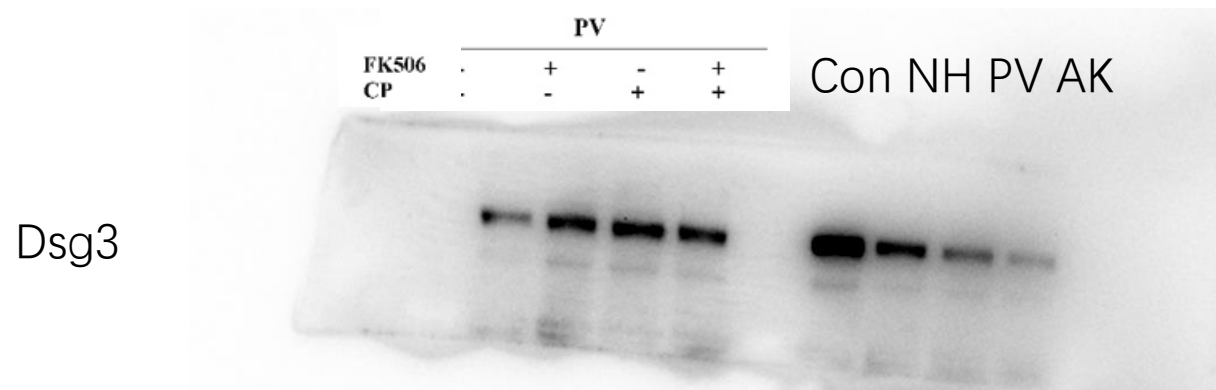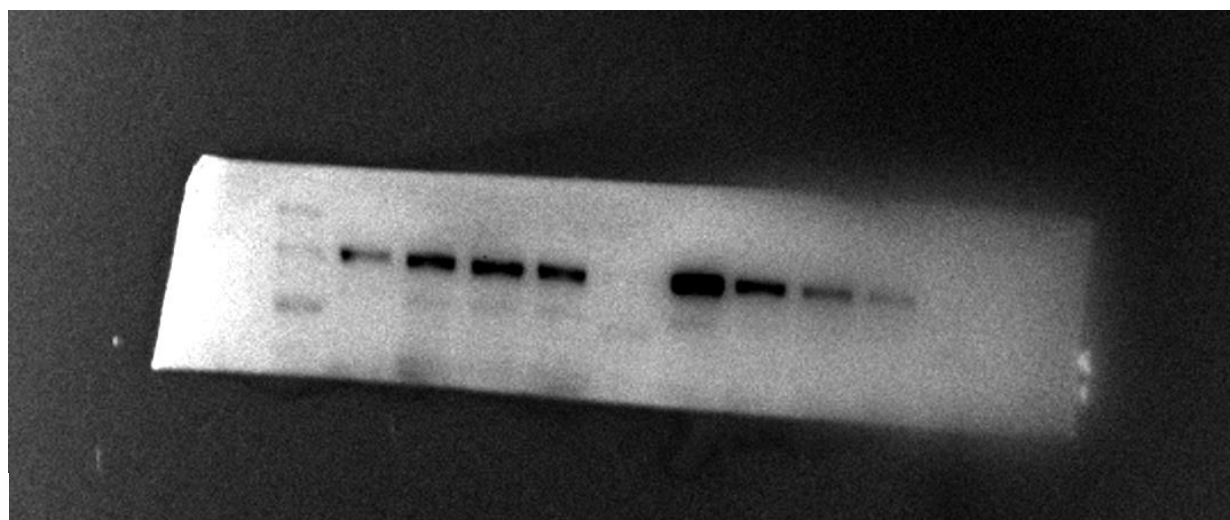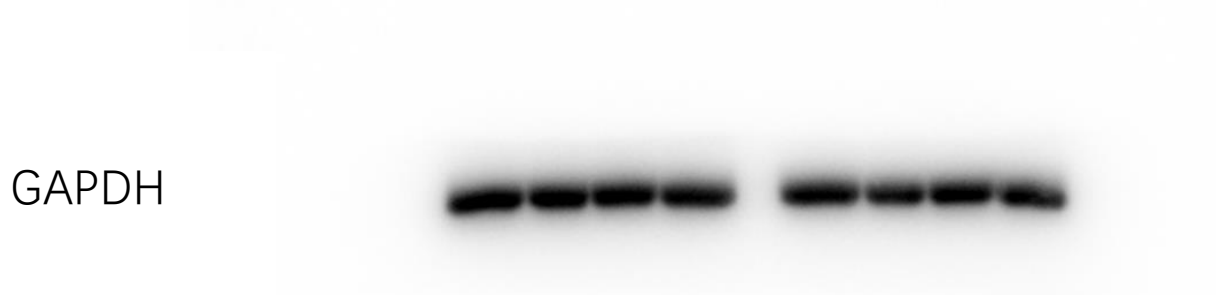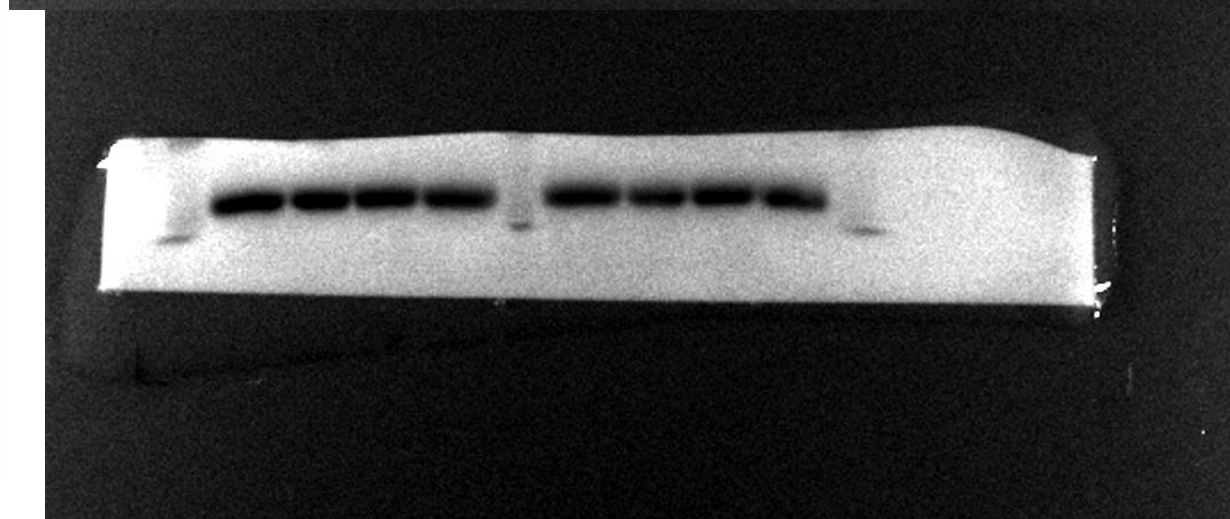

# Figure 3

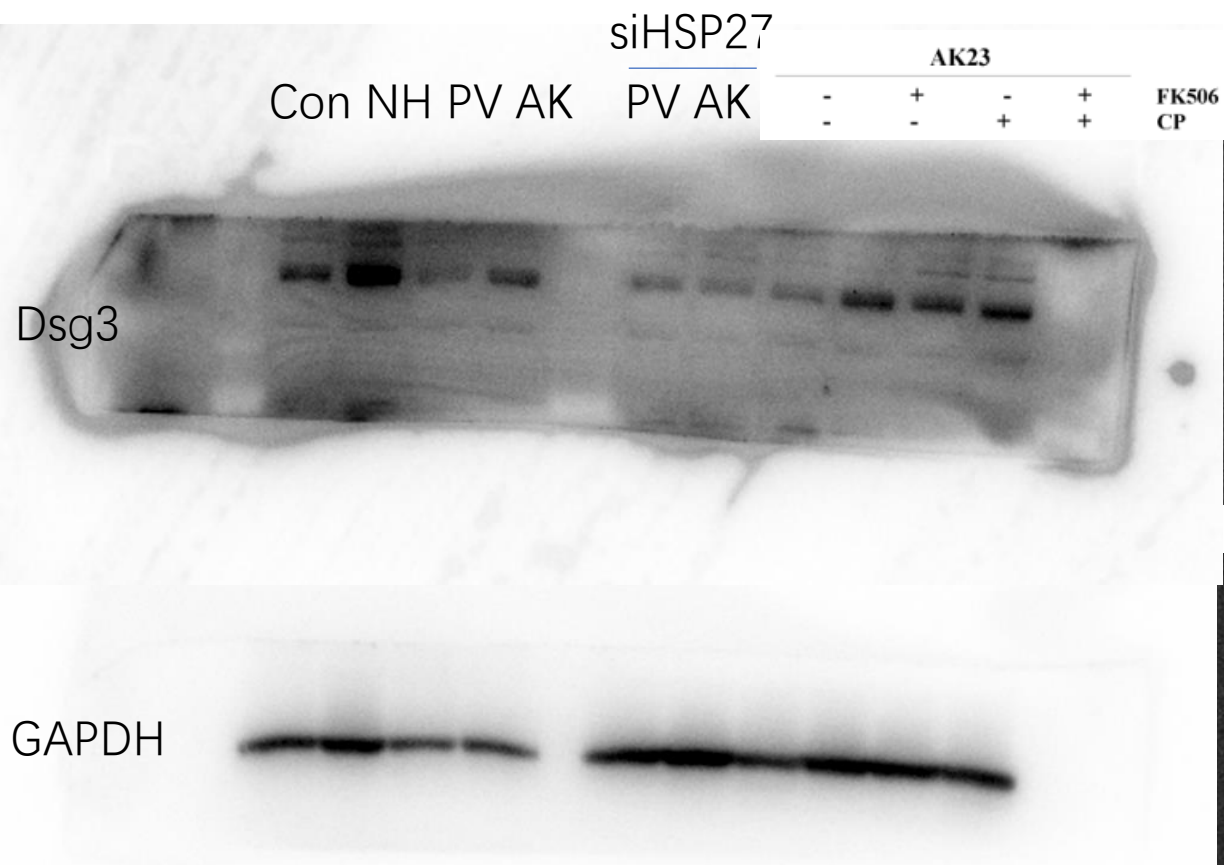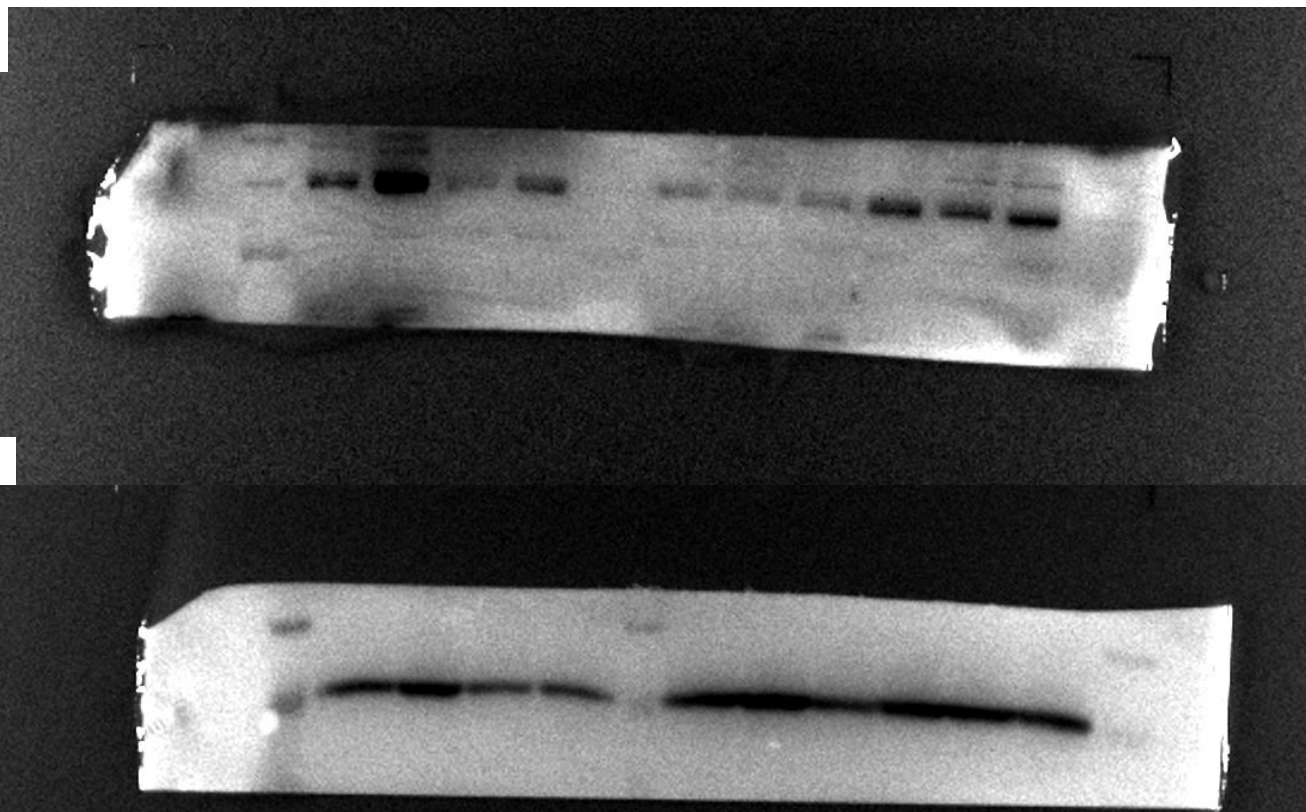



# Figure 4

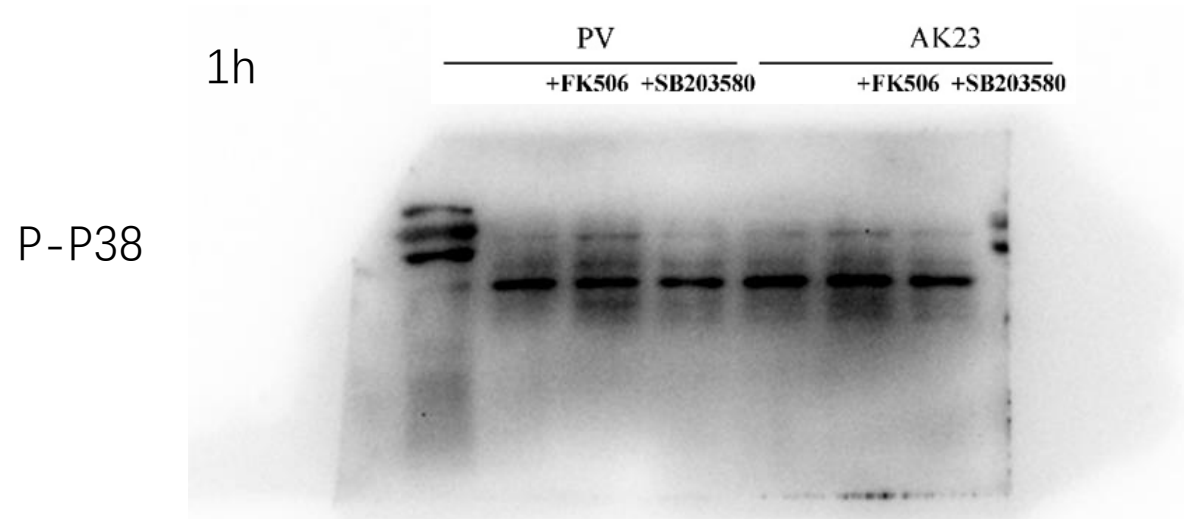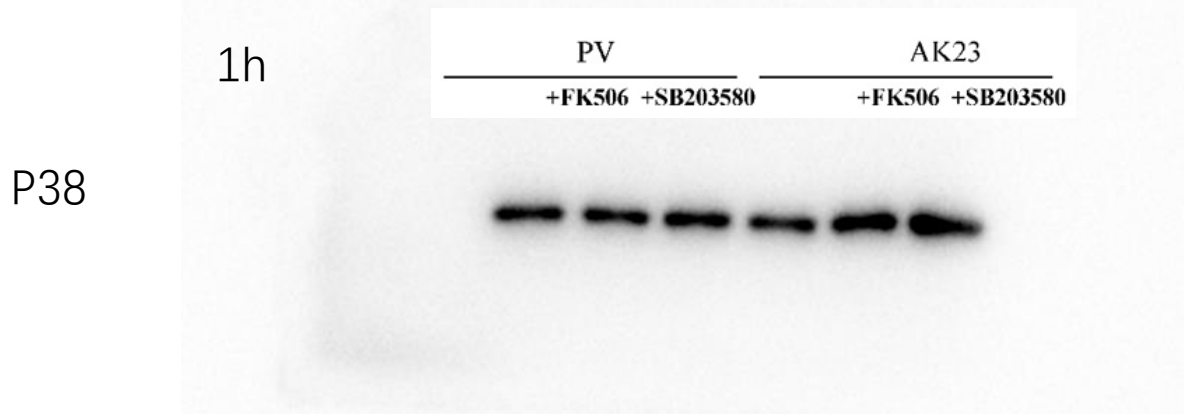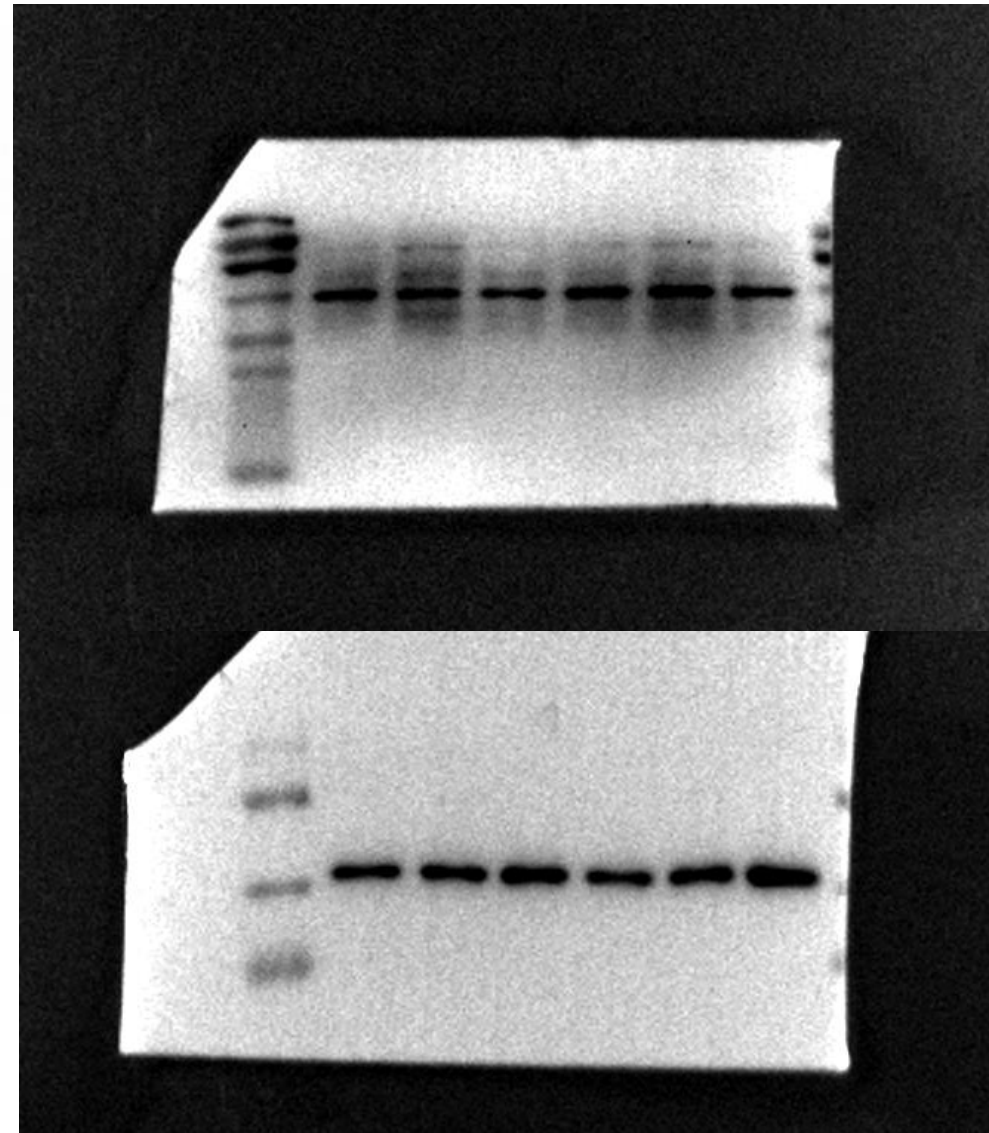

# Figure 4

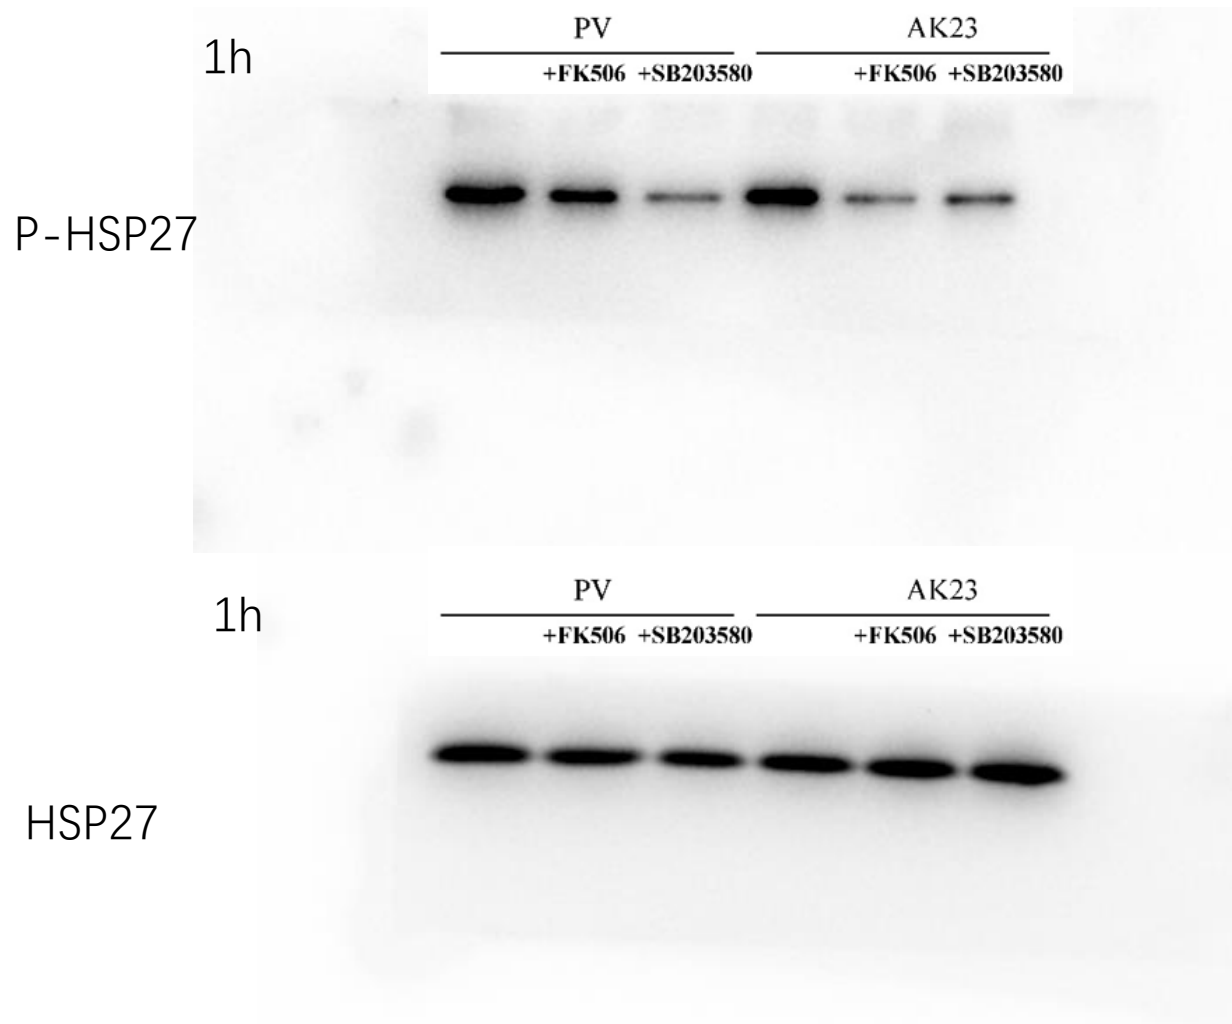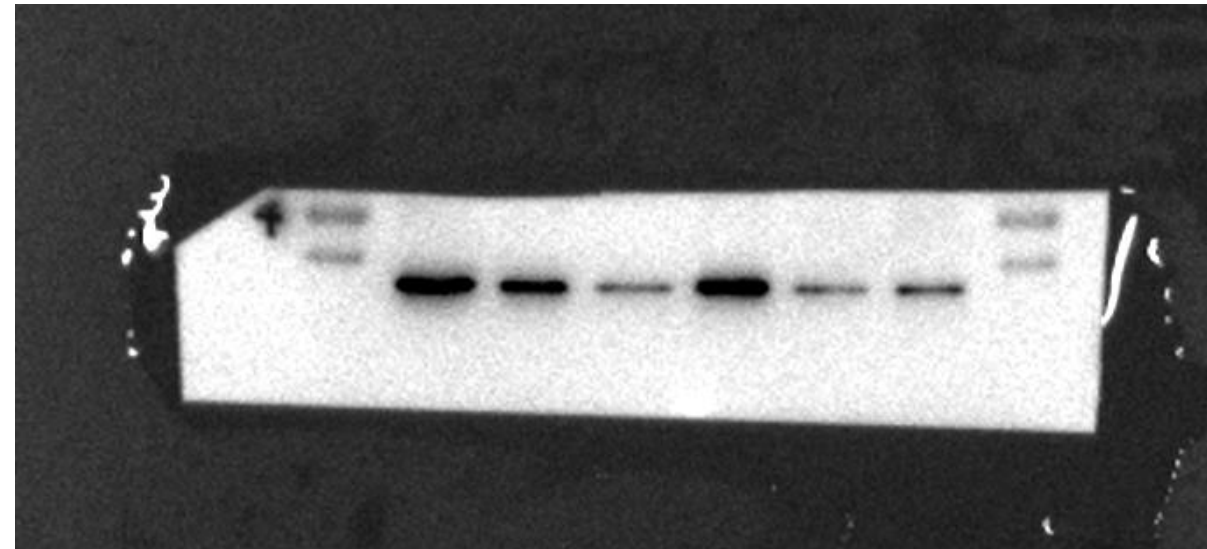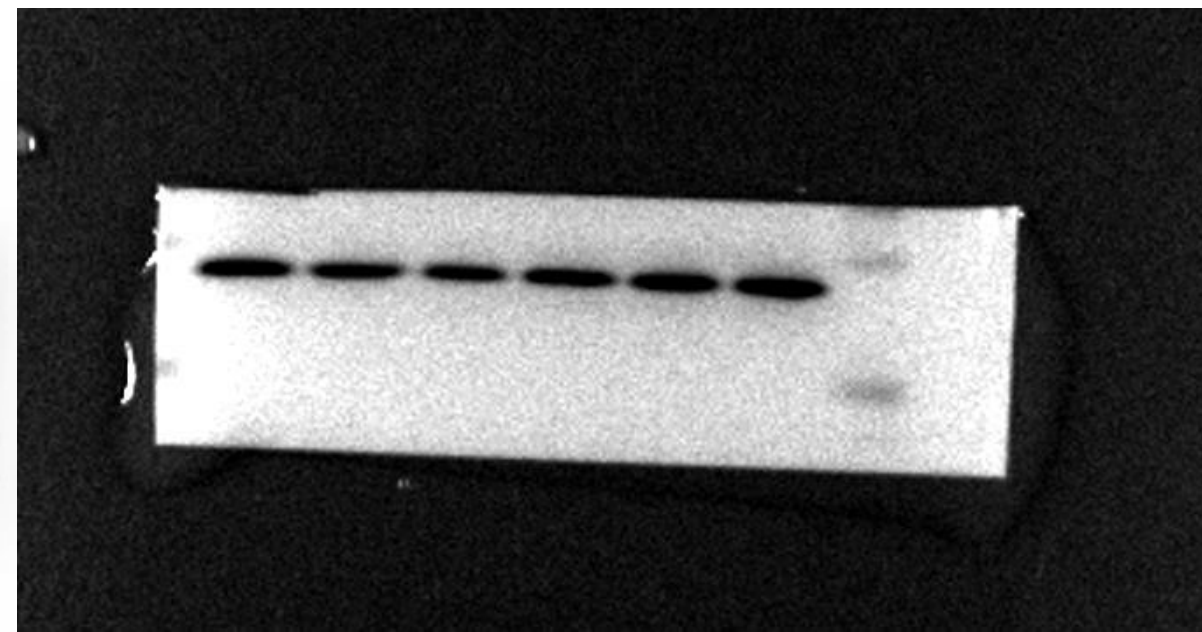

Supplement: 12865_2023_582_MOESM2_ESM.pdf [file 12865_2023_582_MOESM2_ESM.pdf]
